# Supplementary material for: Novel Surrogate Markers of CNS Inflammation in CSF in the Diagnosis of Autoimmune Encephalitis
Source: PubMed Central journal article supplement (PMC7034172; doi:10.3389/fneur.2019.01390), 2020-02-14
Supplement: Image_1.pdf [file Image_1.pdf]

Figure e-1

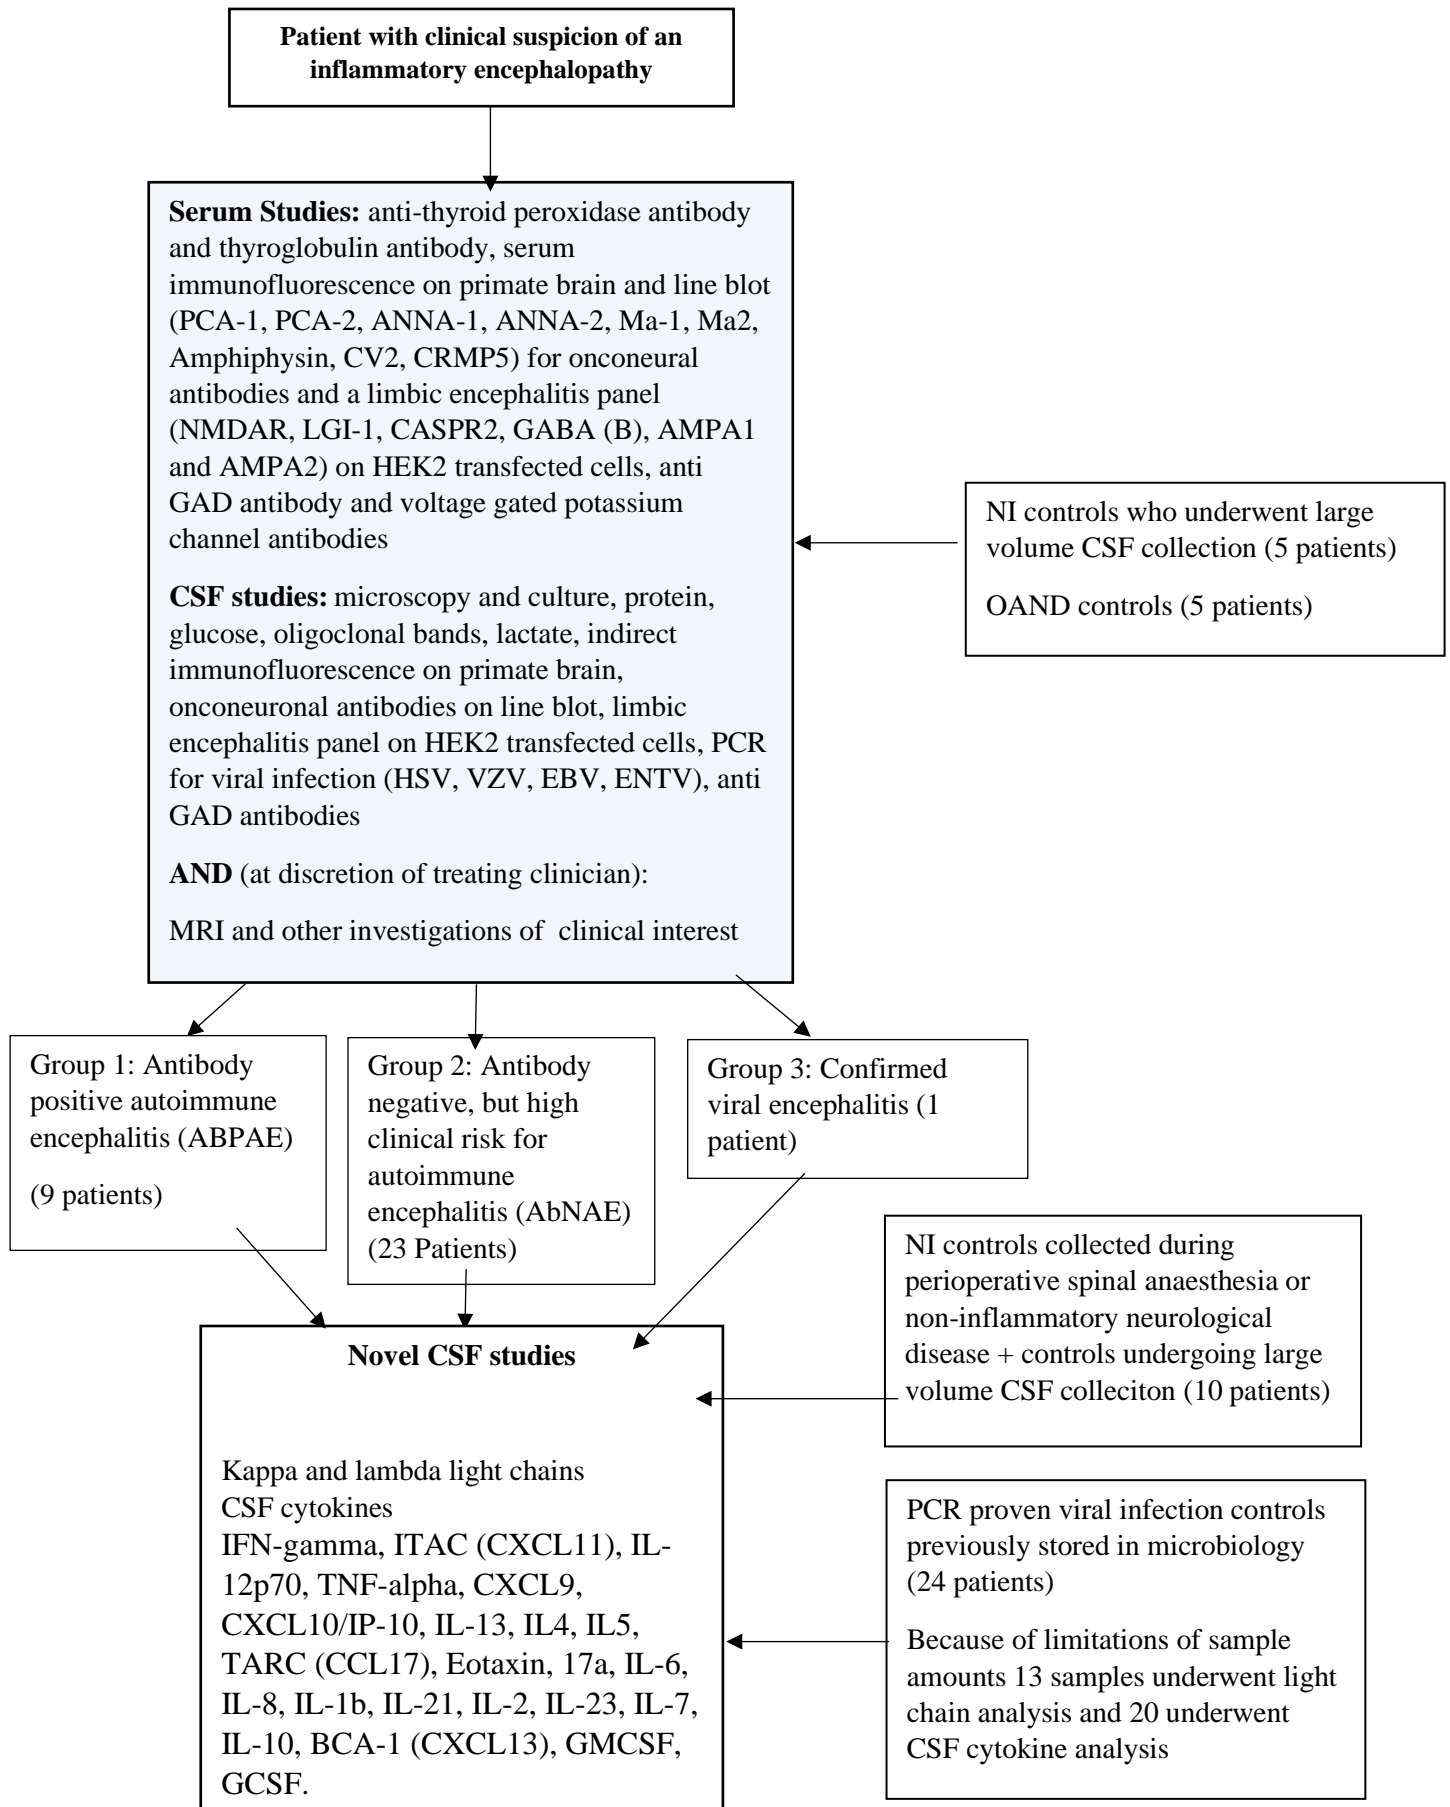

Supplement Figure 1: Recruitment criteria and of patients who entered the study, including patients and samples in the control groups, and all investigations conducted as part of the study.
